# Supplementary material for: Molecular detection of Batrachochytrium dendrobatidis (Chytridiomycota) and culturable skin bacteria associated with three critically endangered species of Atelopus (Anura: Bufonidae) in Ecuador
Source: PeerJ. 2024 Oct 24;12:e18317. doi: 10.7717/peerj.18317 (PMC11512805; doi:10.7717/peerj.18317)
Supplement: Supplemental Information 7 — Each strain includes taxonomic, host and geographic metadata and access numbers to Genbank [file peerj-12-18317-s007.xlsx]

## Sheet: Hoja1
Accession	Isolate code	Source	Strain	Host Specie	Host code	Genus	Specie	Date	Latitud	Longitud	Latitud-longitud	Altitude	Country	Province	Whole location	Location	Collectors
OM859075.1	JY2419C2	Amphibian skin HMOA 2419	BM_11	Atelopus balios	HMOA 2419	Acinetobacter	Acinetobacter aff. junii	2020-10-08	-2.72452	-79.6189	02.72452 S 79.61892 W	107	Ecuador	Guayas	Ecuador: Guayas: Cerro de Hayas	Cerro de Hayas	Luis Oyagata, Mauricio Ortega, Jomira Yánez, Alisson Paredes, Anthony Ocampo
OM859076.1	JY2417C3	Amphibian skin HMOA 2417	BM_12	Atelopus balios	HMOA 2417	Acinetobacter	Acinetobacter junii	2020-10-08	-2.72452	-79.6189	02.72452 S 79.61892 W	107	Ecuador	Guayas	Ecuador: Guayas: Cerro de Hayas	Cerro de Hayas	Luis Oyagata, Mauricio Ortega, Jomira Yánez, Alisson Paredes, Anthony Ocampo
OM859077.1	JY2417C4	Amphibian skin HMOA 2417	BM_13	Atelopus balios	HMOA 2417	Acinetobacter	Acinetobacter junii	2020-10-08	-2.72452	-79.6189	02.72452 S 79.61892 W	107	Ecuador	Guayas	Ecuador: Guayas: Cerro de Hayas	Cerro de Hayas	Luis Oyagata, Mauricio Ortega, Jomira Yánez, Alisson Paredes, Anthony Ocampo
OM859078.1	JY2417C5	Amphibian skin HMOA 2417	BM_14	Atelopus balios	HMOA 2417	Acinetobacter	Acinetobacter junii	2020-10-08	-2.72452	-79.6189	02.72452 S 79.61892 W	107	Ecuador	Guayas	Ecuador: Guayas: Cerro de Hayas	Cerro de Hayas	Luis Oyagata, Mauricio Ortega, Jomira Yánez, Alisson Paredes, Anthony Ocampo
OM859079.1	JY2418C3	Amphibian skin HMOA 2418	BM_15	Atelopus balios	HMOA 2418	Aeromonas	Aeromonas aff. hydrophila	2020-10-08	-2.72452	-79.6189	02.72452 S 79.61892 W	107	Ecuador	Guayas	Ecuador: Guayas: Cerro de Hayas	Cerro de Hayas	Luis Oyagata, Mauricio Ortega, Jomira Yánez, Alisson Paredes, Anthony Ocampo
OM859080.1	JY2419C1	Amphibian skin HMOA 2419	BM_16	Atelopus balios	HMOA 2419	Aeromonas	Aeromonas cf. encheleia	2020-10-08	-2.72452	-79.6189	02.72452 S 79.61892 W	107	Ecuador	Guayas	Ecuador: Guayas: Cerro de Hayas	Cerro de Hayas	Luis Oyagata, Mauricio Ortega, Jomira Yánez, Alisson Paredes, Anthony Ocampo
OM859081.1	JY2418C4	Amphibian skin HMOA 2418	BM_17	Atelopus balios	HMOA 2418	Brucella	Brucella cf. grignonensis	2020-10-08	-2.72452	-79.6189	02.72452 S 79.61892 W	107	Ecuador	Guayas	Ecuador: Guayas: Cerro de Hayas	Cerro de Hayas	Luis Oyagata, Mauricio Ortega, Jomira Yánez, Alisson Paredes, Anthony Ocampo
OM859082.1	JY2420C2	Amphibian skin HMOA 2420	BM_18	Atelopus balios	HMOA 2420	Brucella	Brucella cf. grignonensis	2020-10-08	-2.75077	-79.6127	02.75077 S 79.61269 W	203	Ecuador	Guayas	Ecuador: Guayas: San Miguel-Estero Arenas	San Miguel-Estero Arenas	Luis Oyagata, Mauricio Ortega, Jomira Yánez, Alisson Paredes, Anthony Ocampo
OM859083.1	JY2421C2	Amphibian skin HMOA 2421	BM_19	Atelopus balios	HMOA 2421	Klebsiella	Klebsiella cf. aerogenes	2020-10-08	-2.75077	-79.6127	02.75077 S 79.61269 W	203	Ecuador	Guayas	Ecuador: Guayas: San Miguel-Estero Arenas	San Miguel-Estero Arenas	Luis Oyagata, Mauricio Ortega, Jomira Yánez, Alisson Paredes, Anthony Ocampo
OM859084.1	JY2421C3	Amphibian skin HMOA 2421	BM_20	Atelopus balios	HMOA 2421	Klebsiella	Klebsiella cf. aerogenes	2020-10-08	-2.75077	-79.6127	02.75077 S 79.61269 W	203	Ecuador	Guayas	Ecuador: Guayas: San Miguel-Estero Arenas	San Miguel-Estero Arenas	Luis Oyagata, Mauricio Ortega, Jomira Yánez, Alisson Paredes, Anthony Ocampo
OM859085.1	JY2419C3	Amphibian skin HMOA 2419	BM_21	Atelopus balios	HMOA 2419	Lelliottia	Lelliottia aff. nimipressuralis	2020-10-08	-2.72452	-79.6189	02.72452 S 79.61892 W	107	Ecuador	Guayas	Ecuador: Guayas: Cerro de Hayas	Cerro de Hayas	Luis Oyagata, Mauricio Ortega, Jomira Yánez, Alisson Paredes, Anthony Ocampo
OM859086.1	JY2416C2	Amphibian skin HMOA 2416	BM_22	Atelopus balios	HMOA 2416	Microbacterium	Microbacterium aff. paraoxydans	2020-10-08	-2.72452	-79.6189	02.72452 S 79.61892 W	107	Ecuador	Guayas	Ecuador: Guayas: Cerro de Hayas	Cerro de Hayas	Luis Oyagata, Mauricio Ortega, Jomira Yánez, Alisson Paredes, Anthony Ocampo
OM859087.1	JY2416C1	Amphibian skin HMOA 2416	BM_23	Atelopus balios	HMOA 2416	Microbacterium	Microbacterium paraoxydans	2020-10-08	-2.72452	-79.6189	02.72452 S 79.61892 W	107	Ecuador	Guayas	Ecuador: Guayas: Cerro de Hayas	Cerro de Hayas	Luis Oyagata, Mauricio Ortega, Jomira Yánez, Alisson Paredes, Anthony Ocampo
OM859088.1	JY2398C2	Amphibian skin HMOA 2398	BM_24	Atelopus nanay	HMOA 2398	Pseudomonas	Pseudomonas aff. brenneri	2020-10-05	-2.88337	-79.3069	02.88337 S 79.30685 W	3800	Ecuador	Azuay	Ecuador: Azuay: Parque Nacional Cajas	Parque Nacional Cajas	Juan Webster, José Cáceres, Mauricio Ortega, Leopoldo Naranjo, Jomira Yánez, Lenin Riascos, Evelyn Ocampo, Jackeline Arpi
OM859089.1	JY2397C2	Amphibian skin HMOA 2397	BM_25	Atelopus nanay	HMOA 2397	Pseudomonas	Pseudomonas aff. Gessardii	2020-10-05	-2.88337	-79.3069	02.88337 S 79.30685 W	3800	Ecuador	Azuay	Ecuador: Azuay: Parque Nacional Cajas	Parque Nacional Cajas	Juan Webster, José Cáceres, Mauricio Ortega, Leopoldo Naranjo, Jomira Yánez, Lenin Riascos, Evelyn Ocampo, Jackeline Arpi
OM859090.1	JY2418C1	Amphibian skin HMOA 2418	BM_26	Atelopus balios	HMOA 2418	Pseudomonas	Pseudomonas cf. alloputida	2020-10-08	-2.72452	-79.6189	02.72452 S 79.61892 W	107	Ecuador	Guayas	Ecuador: Guayas: Cerro de Hayas	Cerro de Hayas	Luis Oyagata, Alisson Paredes, Anthony Ocampo, Mauricio Ortega, Jomira Yánez
OM859091.1	JY2395C2	Amphibian skin HMOA 2395	BM_27	Atelopus bomolochos	HMOA 2395	Pseudomonas	Pseudomonas cf. fluorescens	2020-10-04	-3.15675	-78.8454	03.15675 S 78.84538 W	3064	Ecuador	Azuay	Ecuador: Azuay: Cerro Negro	Cerro Negro	Fausto Siavichán, Mauricio Ortega, Leopoldo Naranjo, Jomira Yánez, Lenin Riascos, Evelyn Ocampo, Jackeline Arpi
OM859092.1	JY2398C1	Amphibian skin HMOA 2398	BM_28	Atelopus nanay	HMOA 2398	Pseudomonas	Pseudomonas cf. fluorescens	2020-10-05	-2.88337	-79.3069	02.88337 S 79.30685 W	3800	Ecuador	Azuay	Ecuador: Azuay: Parque Nacional Cajas	Parque Nacional Cajas	Juan Webster, José Cáceres, Mauricio Ortega, Leopoldo Naranjo, Jomira Yánez, Lenin Riascos, Evelyn Ocampo, Jackeline Arpi
OM859093.1	JY2398C3	Amphibian skin HMOA 2398	BM_29	Atelopus nanay	HMOA 2398	Pseudomonas	Pseudomonas cf. fluorescens	2020-10-05	-2.88337	-79.3069	02.88337 S 79.30685 W	3800	Ecuador	Azuay	Ecuador: Azuay: Parque Nacional Cajas	Parque Nacional Cajas	Juan Webster, José Cáceres, Mauricio Ortega, Leopoldo Naranjo, Jomira Yánez, Lenin Riascos, Evelyn Ocampo, Jackeline Arpi
OM859094.1	JY2398C4	Amphibian skin HMOA 2398	BM_30	Atelopus nanay	HMOA 2398	Pseudomonas	Pseudomonas cf. fluorescens	2020-10-05	-2.88337	-79.3069	02.88337 S 79.30685 W	3800	Ecuador	Azuay	Ecuador: Azuay: Parque Nacional Cajas	Parque Nacional Cajas	Juan Webster, José Cáceres, Mauricio Ortega, Leopoldo Naranjo, Jomira Yánez, Lenin Riascos, Evelyn Ocampo, Jackeline Arpi
OM859095.1	JY2392C1	Amphibian skin HMOA 2392	BM_31	Atelopus bomolochos	HMOA 2392	Pseudomonas	Pseudomonas cf. poae	2020-10-04	-3.15675	-78.8454	03.15675 S 78.84538 W	3064	Ecuador	Azuay	Ecuador: Azuay: Cerro Negro	Cerro Negro	Fausto Siavichán, Mauricio Ortega, Leopoldo Naranjo, Jomira Yánez, Lenin Riascos, Evelyn Ocampo, Jackeline Arpi
OM859096.1	JY2418C2	Amphibian skin HMOA 2418	BM_32	Atelopus balios	HMOA 2418	Pseudomonas	Pseudomonas cf. putida	2020-10-08	-2.72452	-79.6189	02.72452 S 79.61892 W	107	Ecuador	Guayas	Ecuador: Guayas: Cerro de Hayas	Cerro de Hayas	Luis Oyagata, Alisson Paredes, Anthony Ocampo, Mauricio Ortega, Jomira Yánez
OM859097.1	JY2421C1	Amphibian skin HMOA 2421	BM_33	Atelopus balios	HMOA 2421	Pseudomonas	Pseudomonas cf. putida	2020-10-08	-2.75077	-79.6127	02.75077 S 79.61269 W	203	Ecuador	Guayas	Ecuador: Guayas: San Miguel-Estero Arenas	San Miguel-Estero Arenas	Luis Oyagata, Mauricio Ortega, Jomira Yánez, Alisson Paredes, Anthony Ocampo
OM859098.1	JY2392C2	Amphibian skin HMOA 2392	BM_34	Atelopus bomolochos	HMOA 2392	Pseudomonas	Pseudomonas cf. tolaasii	2020-10-04	-3.15675	-78.8454	03.15675 S 78.84538 W	3064	Ecuador	Azuay	Ecuador: Azuay: Cerro Negro	Cerro Negro	Fausto Siavichán, Mauricio Ortega, Leopoldo Naranjo, Jomira Yánez, Lenin Riascos, Evelyn Ocampo, Jackeline Arpi
OM859099.1	JY2395C1	Amphibian skin HMOA 2395	BM_35	Atelopus bomolochos	HMOA 2395	Rhodococcus	Rhodococcus aff. qingshengii	2020-10-04	-3.15675	-78.8454	03.15675 S 78.84538 W	3064	Ecuador	Azuay	Ecuador: Azuay: Cerro Negro	Cerro Negro	Fausto Siavichán, Mauricio Ortega, Leopoldo Naranjo, Jomira Yánez, Lenin Riascos, Evelyn Ocampo, Jackeline Arpi
OM859100.1	JY2395C3	Amphibian skin HMOA 2395	BM_36	Atelopus bomolochos	HMOA 2395	Rhodococcus	Rhodococcus qingshengii	2020-10-04	-3.15675	-78.8454	03.15675 S 78.84538 W	3064	Ecuador	Azuay	Ecuador: Azuay: Cerro Negro	Cerro Negro	Fausto Siavichán, Mauricio Ortega, Leopoldo Naranjo, Jomira Yánez, Lenin Riascos, Evelyn Ocampo, Jackeline Arpi
OM859101.1	JY2421C4	Amphibian skin HMOA 2421	BM_37	Atelopus balios	HMOA 2421	Serratia	Serratia cf. marcescens	2020-10-08	-2.75077	-79.6127	02.75077 S 79.61269 W	203	Ecuador	Guayas	Ecuador: Guayas: San Miguel-Estero Arenas	San Miguel-Estero Arenas	Luis Oyagata, Mauricio Ortega, Jomira Yánez, Alisson Paredes, Anthony Ocampo
OM859102.1	JY2397C1	Amphibian skin HMOA 2397	BM_38	Atelopus nanay	HMOA 2397	Serratia	Serratia cf. proteamaculans	2020-10-05	-2.88337	-79.3069	02.88337 S 79.30685 W	3800	Ecuador	Azuay	Ecuador: Azuay: Parque Nacional Cajas	Parque Nacional Cajas	Juan Webster, José Cáceres, Mauricio Ortega, Leopoldo Naranjo, Jomira Yánez, Lenin Riascos, Evelyn Ocampo, Jackeline Arpi
OM859103.1	JY2397C4	Amphibian skin HMOA 2397	BM_39	Atelopus nanay	HMOA 2397	Serratia	Serratia cf. proteamaculans	2020-10-05	-2.88337	-79.3069	02.88337 S 79.30685 W	3800	Ecuador	Azuay	Ecuador: Azuay: Parque Nacional Cajas	Parque Nacional Cajas	Juan Webster, José Cáceres, Mauricio Ortega, Leopoldo Naranjo, Jomira Yánez, Lenin Riascos, Evelyn Ocampo, Jackeline Arpi
OM859104.1	JY2417C2	Amphibian skin HMOA 2417	BM_40	Atelopus balios	HMOA 2417	Serratia	Serratia marcescens	2020-10-08	-2.72452	-79.6189	02.72452 S 79.61892 W	107	Ecuador	Guayas	Ecuador: Guayas: Cerro de Hayas	Cerro de Hayas	Luis Oyagata, Alisson Paredes, Anthony Ocampo, Mauricio Ortega, Jomira Yánez
OM859105.1	JY2415C1	Amphibian skin HMOA 2415	BM_41	Atelopus balios	HMOA 2415	Stenotrophomonas	Stenotrophomonas aff. maltophilia	2020-10-08	-2.72452	-79.6189	02.72452 S 79.61892 W	107	Ecuador	Guayas	Ecuador: Guayas: Cerro de Hayas	Cerro de Hayas	Luis Oyagata, Alisson Paredes, Anthony Ocampo, Mauricio Ortega, Jomira Yánez
OM859106.1	JY2415C2	Amphibian skin HMOA 2415	BM_42	Atelopus balios	HMOA 2415	Stenotrophomonas	Stenotrophomonas aff. maltophilia	2020-10-08	-2.72452	-79.6189	02.72452 S 79.61892 W	107	Ecuador	Guayas	Ecuador: Guayas: Cerro de Hayas	Cerro de Hayas	Luis Oyagata, Alisson Paredes, Anthony Ocampo, Mauricio Ortega, Jomira Yánez
OM859107.1	JY2415C3	Amphibian skin HMOA 2415	BM_43	Atelopus balios	HMOA 2415	Stenotrophomonas	Stenotrophomonas aff. maltophilia	2020-10-08	-2.72452	-79.6189	02.72452 S 79.61892 W	107	Ecuador	Guayas	Ecuador: Guayas: Cerro de Hayas	Cerro de Hayas	Luis Oyagata, Alisson Paredes, Anthony Ocampo, Mauricio Ortega, Jomira Yánez
OM859108.1	JY2416C4	Amphibian skin HMOA 2416	BM_44	Atelopus balios	HMOA 2416	Stenotrophomonas	Stenotrophomonas aff. maltophilia	2020-10-08	-2.72452	-79.6189	02.72452 S 79.61892 W	107	Ecuador	Guayas	Ecuador: Guayas: Cerro de Hayas	Cerro de Hayas	Luis Oyagata, Alisson Paredes, Anthony Ocampo, Mauricio Ortega, Jomira Yánez
OM859109.1	JY2420C1	Amphibian skin HMOA 2420	BM_45	Atelopus balios	HMOA 2420	Stenotrophomonas	Stenotrophomonas aff. maltophilia	2020-10-08	-2.75077	-79.6127	02.75077 S 79.61269 W	203	Ecuador	Guayas	Ecuador: Guayas: San Miguel-Estero Arenas	San Miguel-Estero Arenas	Luis Oyagata, Mauricio Ortega, Jomira Yánez, Alisson Paredes, Anthony Ocampo
